# Supplementary material for: Characterization of a Unique Pair of Ferredoxin and Ferredoxin NADP+ Reductase Isoforms That Operates in Non-Photosynthetic Glandular Trichomes
Source: MDPI journal article supplement (doi:10.3390/plants13030409), 2024-01-30
Supplement: s1 [file s1]

## Supplementary Materials

**Table S1.** List of primers used to amplify and clone *Fd* and *FNR* genes from first-strand cDNA into a pSBET expression vector. Plastidial targeting sequences are excluded to generate amplicons that correspond to the native proteins.

| Gene                   | Primer ID | Primer Forward (5'-3')     | Primer Reverse (5'-3')           |
|------------------------|-----------|----------------------------|----------------------------------|
| FNR (Leaf)             | L-FNR-A   | TGGCACAGGTAACCACAGAAGCAC   | CTCAGTACACTTCCACATTCCACTG        |
| FNR (Leaf)             | L-FNR-B   | TATGGCACAGGTAACCACAGAAGCAC | GATCCTCAGTACACTTCCACATTCCACTG    |
| FNR (GT/Root)          | R-FNR-A   | TGTCACTGCAACAAGCTAGC       | CTTAGTAGACTTCAACATGCCA           |
| FNR (GT/Root)          | R-FNR-B   | TATGTCACTGCAACAAGCTAGC     | GATCCTTAGTAGACTTCAACATGCCA       |
| Fd I (Leaf)            | Fd-1-A    | TGGCTAGCTACAAGGTGAAGCTG    | CTCAAGCAATATCATCCTCCTTGTGCTG     |
| Fd I (Leaf)            | Fd-1-B    | TATGGCTAGCTACAAGGTGAAGCTG  | GATCCTCAAGCAATATCATCCTCCTTGTGCTG |
| Fd II (Major GT/Root)  | Fd-2-A    | TGGCTGTATACAAGGTGAAAC      | CTCAGTAGAGATCACCTCC              |
| Fd II (Major GT/Root)  | Fd-2-B    | TATGGCTGTATACAAGGTGAAAC    | GATCCTCAGTAGAGATCACCTCC          |
| Fd III (Minor GT/Root) | Fd-3-A    | TGGCCACATACAAGGTGAAATTG    | CTCAATACAAATCACTTTCCTTGTG        |
| Fd III (Minor GT/Root) | Fd-3-B    | TATGGCCACATACAAGGTGAAATTG  | GATCCTCAATACAAATCACTTTCCTTGTG    |

**Table S2.** List of peppermint genes and their respective primers that were used in the qPCR analysis.

| Gene          | Type         | Name                                                        | qPCR FWD (5'-3')       | qPCR REV (5'-3')        |
|---------------|--------------|-------------------------------------------------------------|------------------------|-------------------------|
| GAPDH         | Reference    | Glyceraldehyde-3-Phosphate Dehydrogenase                    | AGGCATCCTTCGGTCTAAATG  | TGTGTCGCCGTTGCTTTA      |
| ACT           | Reference    | Actin                                                       | TGTCAGCAACTGGGATGATATG | CGATTGGCCTTGGGATTAAGA   |
| CYP           | Reference    | Cyclophilin                                                 | CGGAAGGATCGTGATGGAG    | GAAGCACGATCCCTTGTAGT    |
| EIF3E         | Reference    | Eukaryotic Translation Initiation Factor 3E                 | TCGCACTTGAGGAGCTTAAC   | CGTTGTCATGGTTGAAGAAGATG |
| PP2A          | Reference    | Serine/threonine-protein phosphatase 2A                     | CTGGAGGTCATGTACCAGAAAC | CCACGTAGGAGAGTAATGTTAGC |
| $\alpha$ -TUB | Reference    | Alpha Tubulin                                               | TGACACGTCTGTGCGAATTG   | CCAGTCCTAACTTCGTCGATAAC |
| Fd III + PT   | Experimental | Ferredoxin III (Minor) (with plastidial targeting sequence) | TCACGACTGCACCTCTGA     | TGGCCATTGCAGAAGCTC      |
| Fd II + PT    | Experimental | Ferredoxin II (Major) (with plastidial targeting sequence)  | CAAAAGTGCTCCTCAAAGGC   | GGCAGTTGCTTTGAAATCGG    |
| Fd I          | Experimental | Ferredoxin I (Leaf)                                         | ACAAGGTGAAGCTGGTGAC    | AGGTGGAGCAGGATCCG       |
| R-FNR         | Experimental | Ferredoxin NADP-Reductase (from GTs / roots)                | CACCCTTAGCAGAGAACAGAAG | CTTGAGCCACAGAAGTAGATG   |
| L-FNR         | Experimental | Ferredoxin NADP-Reductase (from leaves)                     | GCTCCTTTCGCTCTTTCTT    | GCTCGAATTCCTCCTTGTAGAG  |

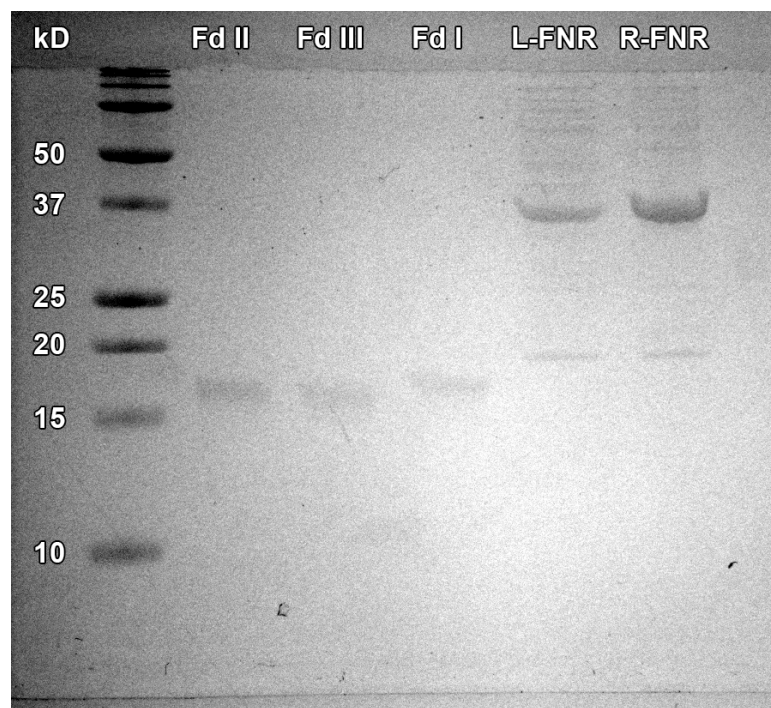

**Figure S1.** Tricine SDS-PAGE (16 %) of purified recombinant Fd and FNR isoforms from peppermint. All experimental lanes contain 20  $\mu$ g of protein as determined by the Bradford protein assay. The ladder lane (left) contains 3.5  $\mu$ l of Precision Plus Protein Standard (Cat. No. 161-0373, Bio-Rad, Hercules, CA, USA).

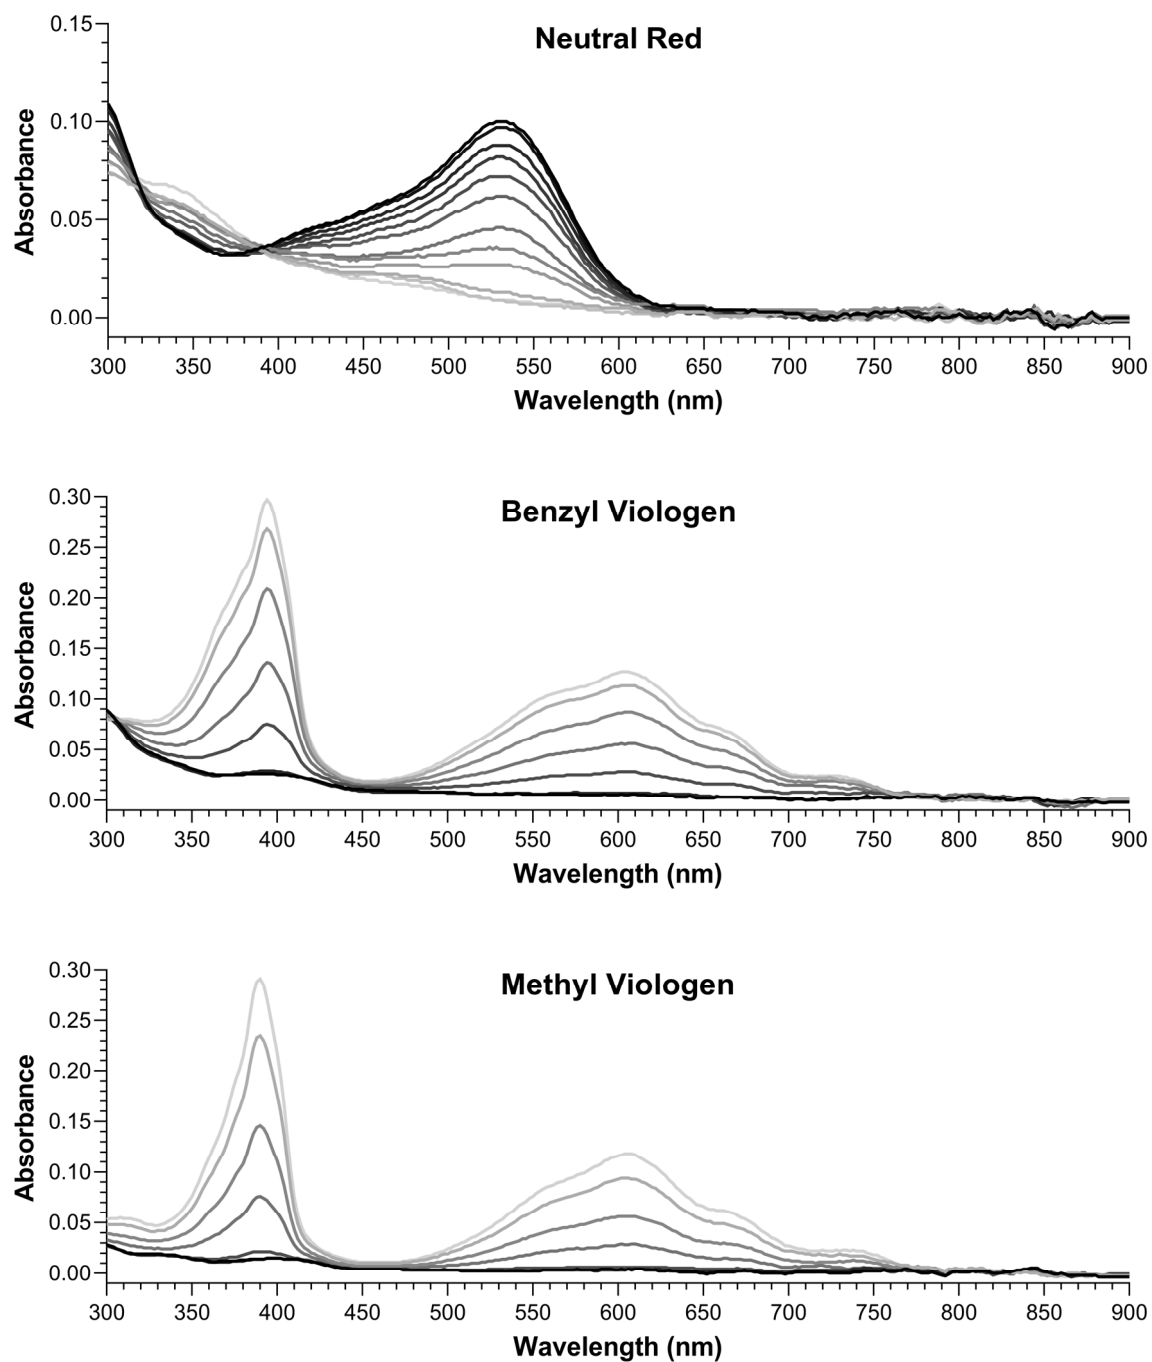

**Figure S2.** Absorbance spectrum of individual redox dyes subjected to photoreduction for determination of isosbestic points. Black lines are most oxidized and light-gray lines are most reduced. Top panel, neutral red; middle panel, benzyl viologen; bottom panel, methyl viologen.

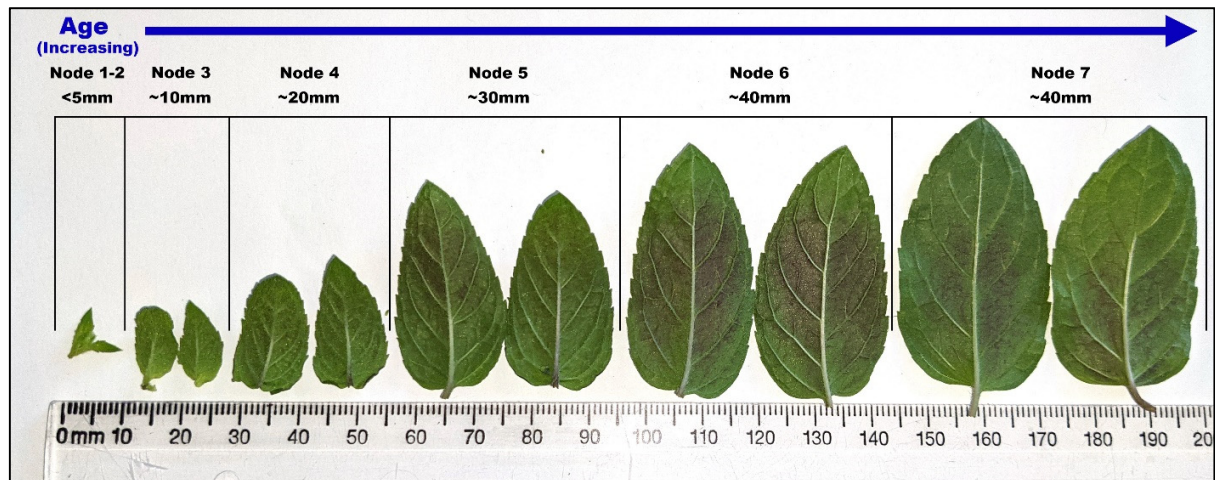

**Figure S3.** Peppermint leaves in order of increasing developmental age and their respective leaf blade lengths (measured from the tip of the leaf to point of petiole attachment). Leaves are grouped in pairs based on their stem attachment node and increasing distance from the meristem.

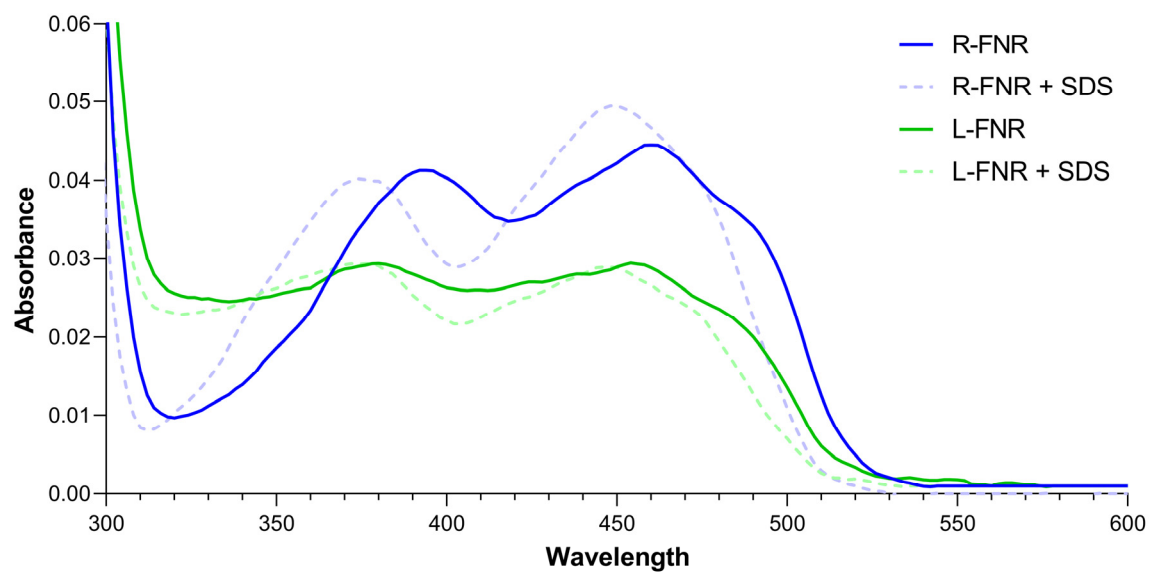

**Figure S4.** Characteristic absorbance spectra of purified, recombinant FNR isoforms from peppermint (diluted 1:10 from stock in 10 mM HEPES buffer at pH 7.0). Solid lines show FNR isoforms without SDS denaturation with  $\lambda_{max}$  at 392 nm and 460 nm for R-FNR (blue) and 380 nm and 456 nm for L-FNR (green). Dashed lines show FNR isoforms denatured by the addition of SDS up to 0.2%, demonstrating the characteristic absorbance spectra of the now dissociated FAD cofactor with  $\lambda_{max}$  shifted to 375 nm and 450 nm for both isoforms.

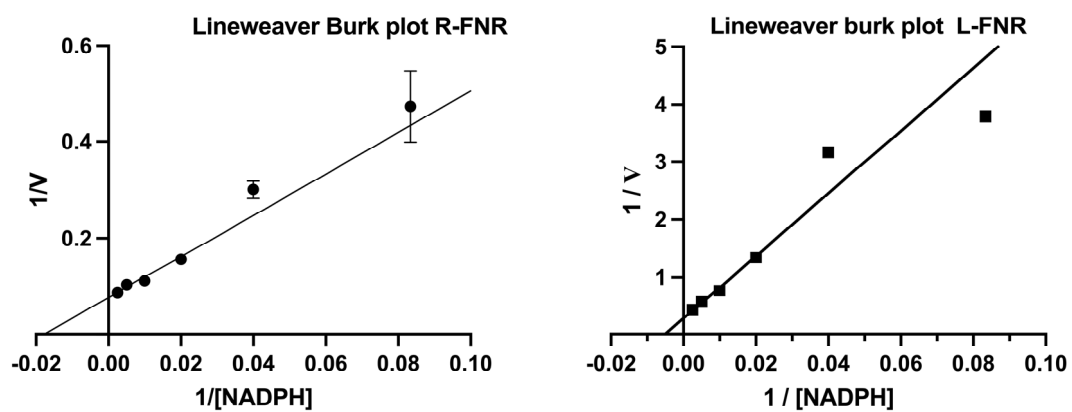

**Figure S5.** Potassium ferricyanide diaphorase Lineweaver-Burk plots for 0.05  $\mu$ M R-FNR and 0.05  $\mu$ M L-FNR from peppermint paired with variable concentrations of NADPH.

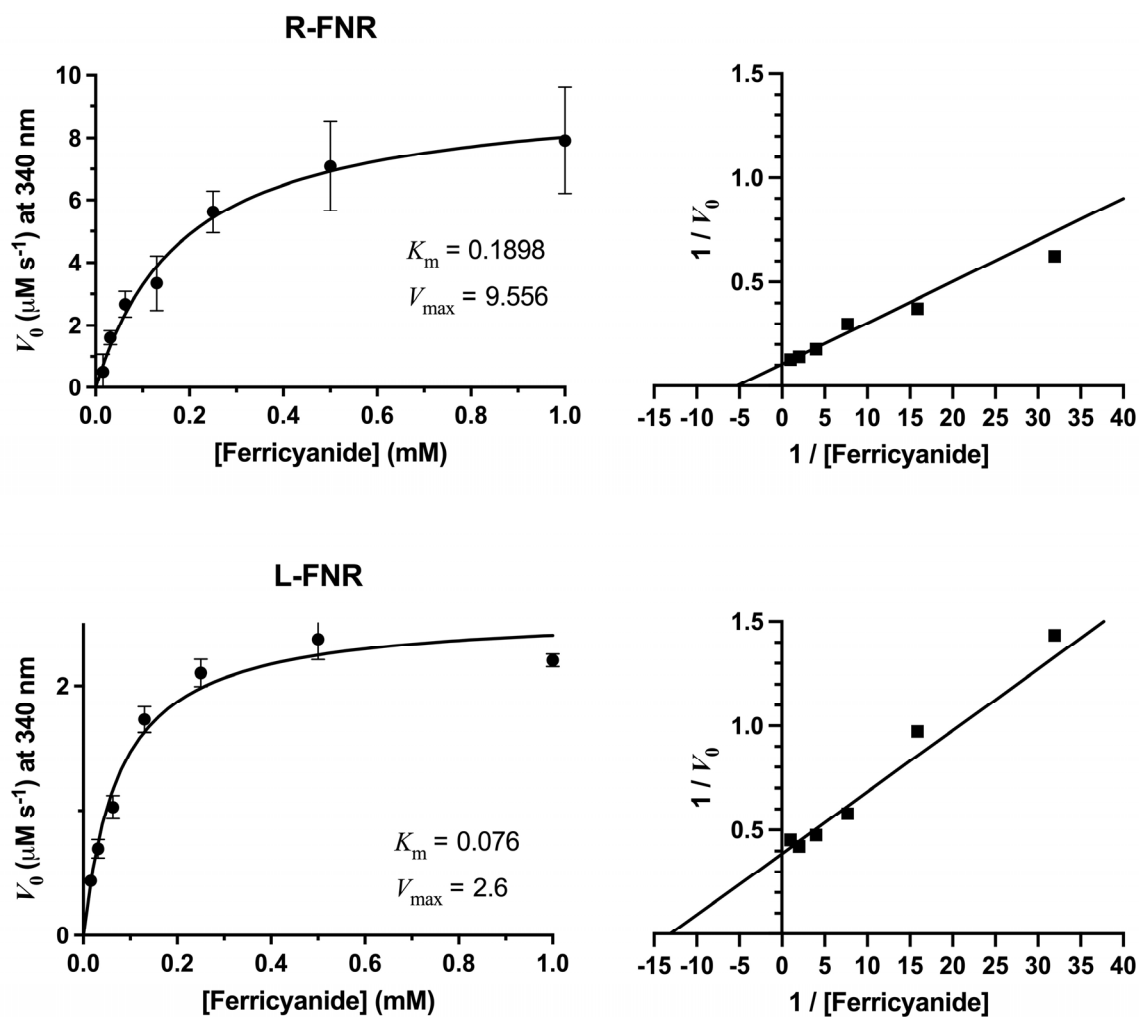

**Figure S6.** Potassium ferricyanide diaphorase Michaelis-Menten curves (left side) and Lineweaver-Burk plots (right side) for 0.05  $\mu\text{M}$  R-FNR and 0.05  $\mu\text{M}$  L-FNR from peppermint paired with variable concentrations of potassium ferricyanide.

|                   |              |               |                  |                 |               |                 |       |     |
|-------------------|--------------|---------------|------------------|-----------------|---------------|-----------------|-------|-----|
|                   |              | 10            | 20               | 30              | 40            | 50              | 60    |     |
| R-FNR             | MAHSVLSQVP   | VAVSVNNDVS    | LRK-SVFKSN       | HVSFHEKSW       | SSLSMDFRIS    | SFQSKGRPT-      |       | 58  |
| L-FNR             | MTAAVSAAVS   | LPSSKSTSLT    | ART-SIVSPE       | RIHFNK----      | --FPLHYRNV    | AK---IVPIR      |       | 50  |
| L-FNR-spinach     | MTTAVTAAVS   | FPSTKTTSLS    | ARSSSVISPD       | KISYKK----      | --VPLLYRNV    | SATGKMGPPIR     |       | 54  |
| Clustal Consensus | *: *: *      | . : . . . . . | *. * . . : : : : | . : *: :        |               |                 |       | 23  |
|                   |              | 70            | 80               | 90              | 100           | 110             | 120   |     |
| R-FNR             | --VCM SVQQA  | SKPKVAVSPL    | SLEDADPPL        | HLFKNKEPYT      | GTIVSVVERIV   | GENAPGETCH      |       | 116 |
| L-FNR             | AQVT-----    | TEAPAKAEKI    | HKKQEEGIIV       | NKFRPKPEYV      | GRCLLNVRILT   | GDDAPGETWH      |       | 104 |
| L-FNR-spinach     | AQIASDVEAP   | PPAPAKVEKH    | SKKMEEGITV       | NKFKPKTPYV      | GRCLLNTKIT    | GDDAPGETWH      | (59)  | 114 |
| Clustal Consensus | :            | . .           | : : . : *        | * * *           | * : : .       | * : * : *       |       | 46  |
|                   |              | 130           | 140              | 150             | 160           | 170             | 180   |     |
| R-FNR             | IVIDHDKVP    | YWEGQSYGII    | PPGENPKPG        | NPHNVRLYSI      | ASTRYGDFFD    | GKTASFVRR       |       | 176 |
| L-FNR             | MVFSTEGEVP   | YREGQSIGII    | PDGID--KNG       | KPHKLRLYSI      | ASSALGDFGD    | SKTVSLCVKR      |       | 162 |
| L-FNR-spinach     | MVFSHEGEIP   | YREGQSVGVI    | PDGED--KNG       | KPHKLRLYSI      | ASSALGDFGD    | AKSVSLCVKR      | (117) | 172 |
| Clustal Consensus | *: . : *: *  | * * * * *     | * * : *          | * * : * : * : * | ** : * * *    | * . : * : * : * |       | 92  |
|                   |              | 190           | 200              | 210             | 220           | 230             | 240   |     |
| R-FNR             | AVYYDPETGK   | EDPSKKGVCS    | NFLCDSPGD        | KVQITGPSGK      | IMLLPENDPN    | ATHIMLATGT      |       | 236 |
| L-FNR             | LIYTND----   | AGEVVKGVCS    | NFLCDLKAGA       | EVKITGPVGK      | EMLMPK-DPN    | ATIIMLGTTG      |       | 217 |
| L-FNR-spinach     | LIYTND----   | AGETIKGVCS    | NFLCDLPGA        | EVKLTGPVGK      | EMLMPK-DPN    | ATIIMLGTTG      | (172) | 227 |
| Clustal Consensus | * :          | . * * * *     | * * * * *        | * : * : * * *   | * : * : * * * | * * * : * * *   |       | 132 |
|                   |              | 250           | 260              | 270             | 280           | 290             | 300   |     |
| R-FNR             | GVAPYRGYLR   | RMFMENVPNF    | KFGGLAWLFL       | GVANKDSLLY      | DEEFSNYLQE    | YPDNFRFDRT      |       | 296 |
| L-FNR             | GIAPFRSFLW   | KMFFEEDHEDY   | KFNGLAWLFL       | GVPTGSSLLY      | KEEFELMKKEK   | NPENFRLDFA      |       | 277 |
| L-FNR-spinach     | GIAPFRSFLW   | KMFFEKHDDY    | KFNGLAWLFL       | GVPTSSSLLY      | KEEFELMKKEK   | APDNFRLDFA      | (232) | 287 |
| Clustal Consensus | *: * : * : * | *: * : *      | : : * * * * * *  | * * . * * *     | . * * * .     | * : * * * : *   |       | 176 |
|                   |              | 310           | 320              | 330             | 340           | 350             | 360   |     |
| R-FNR             | LSREQNKSG    | GKMYVQDKIE    | EYSDEIFKLL       | DN-GAHYIFC      | GLKGMPGFIQ    | DTLKKVAELR      |       | 355 |
| L-FNR             | VSREQTNAKG   | EKMYIQTRMA    | EYAEELWEML       | KKDNTFVYMC      | GLKGMEKGID    | DIMVSLAARD      |       | 337 |
| L-FNR-spinach     | VSREQTNEKG   | EKMYIQTRMA    | QYAVELWEML       | KKDNTFYFMC      | GLKGMEKGID    | DIMVSLAAAE      | (292) | 347 |
| Clustal Consensus | * * * * *    | * * * : *     | : : * : * : * *  | : : . . . * : * | * * * * *     | * * : * : *     |       | 216 |
|                   |              | 370           | 380              |                 |               |                 |       |     |
| R-FNR             | GESWEEKLSQ   | LKKNKQWVE     | VY               | 377             |               |                 |       |     |
| L-FNR             | GIDWIEYKRQ   | LKKAEQWNVE    | VY               | 359             |               |                 |       |     |
| L-FNR-spinach     | GIDWIEYKRQ   | LKKAEQWNVE    | VY               | 369             | (314)         |                 |       |     |
| Clustal Consensus | * . * *      | * * * : * : * | * * *            | 231             |               |                 |       |     |

**Figure S7.** Alignment of FNR sequences. Residue numbers in parentheses are counted after removal of the plastidial targeting sequence. Legend for consensus: "\*" means that the residues in that column are identical in all sequences in the alignment; ":" means that conserved substitutions have been observed; "." means that semi-conserved substitutions are observed. Conserved means the amino acid is replaced by one having similar characteristics.



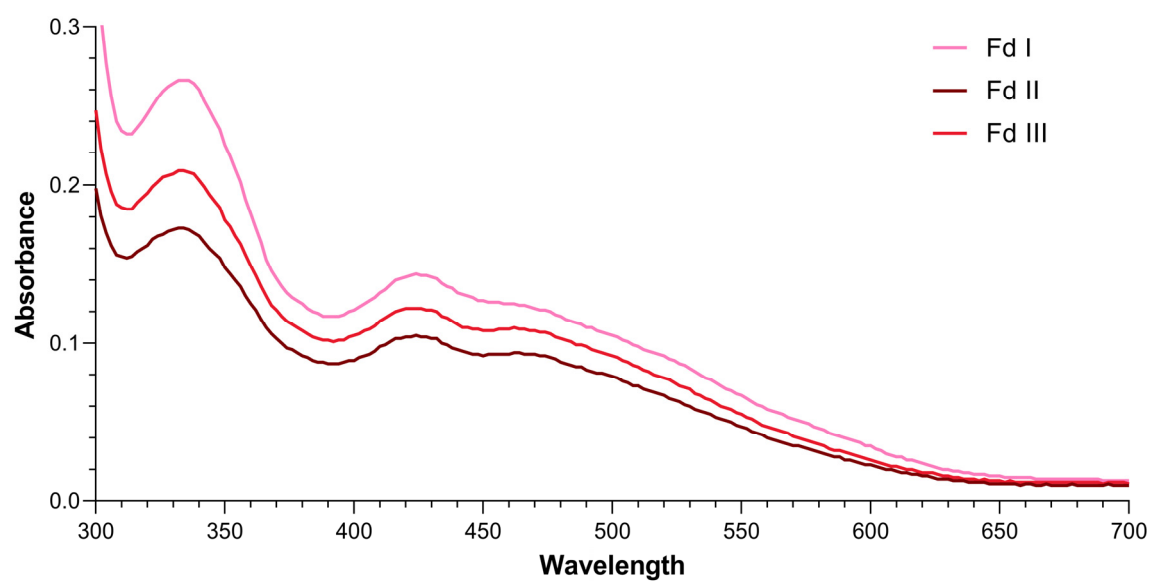

**Figure S8.** Characteristic absorbance spectra of purified recombinant Fd isoforms from peppermint (diluted 1:20 from stock in 50 mM Tris buffer at pH 7.5) with  $\lambda_{max}$  at 330 nm and 420 nm for all isoforms.

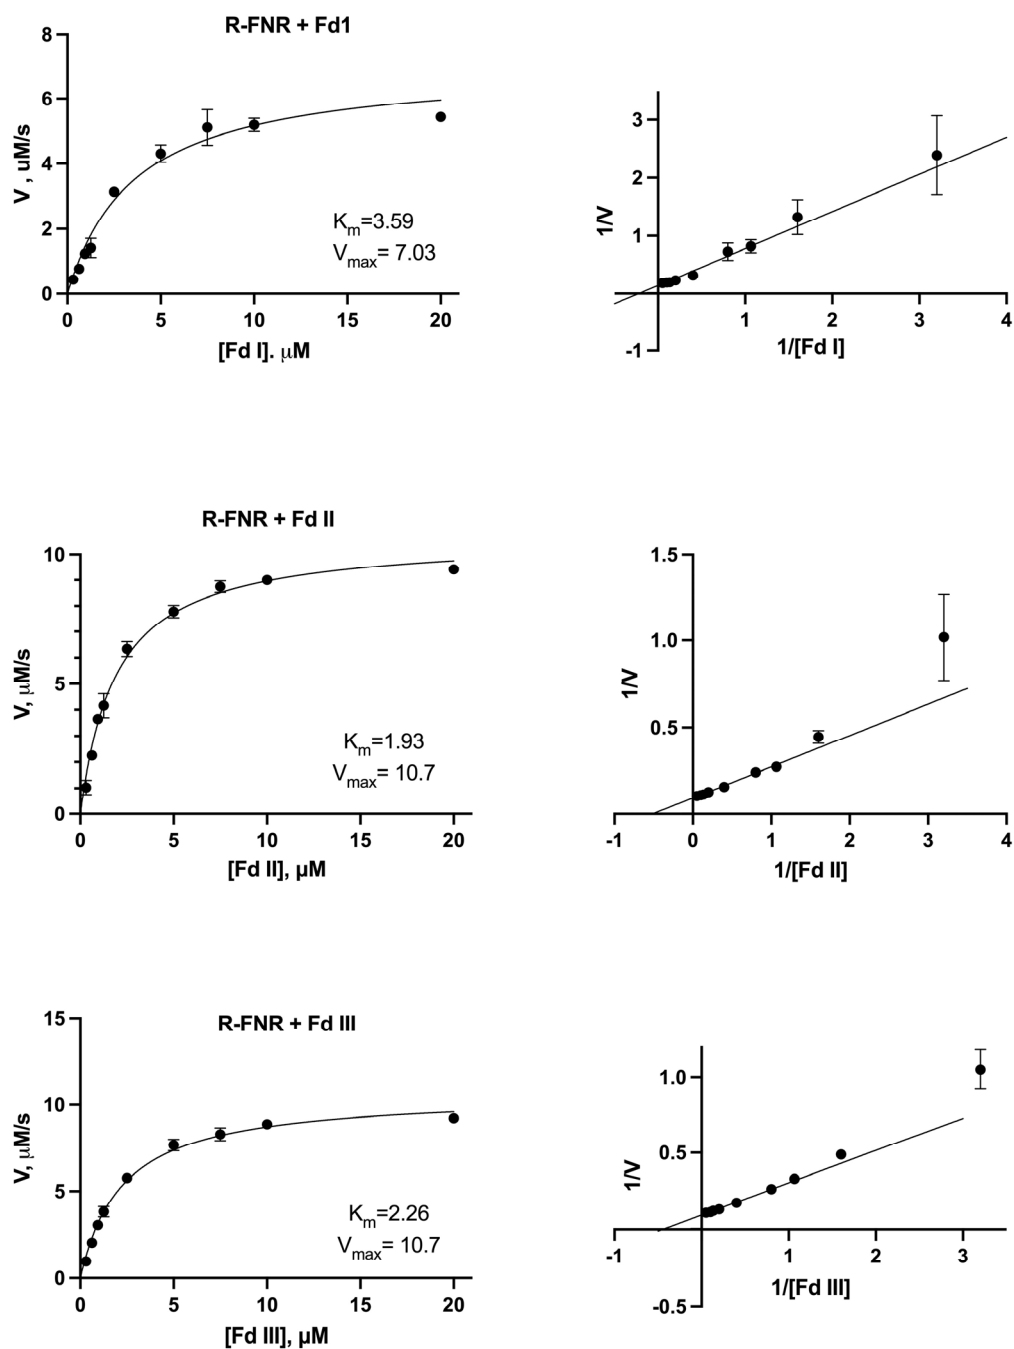

**Figure S9.** Cytochrome c reduction Michaelis-Menten curves (left side) and Lineweaver-Burk plots (right side) for 0.025  $\mu\text{M}$  R-FNR paired with variable concentrations of Fd I, Fd II, and Fd III from peppermint.

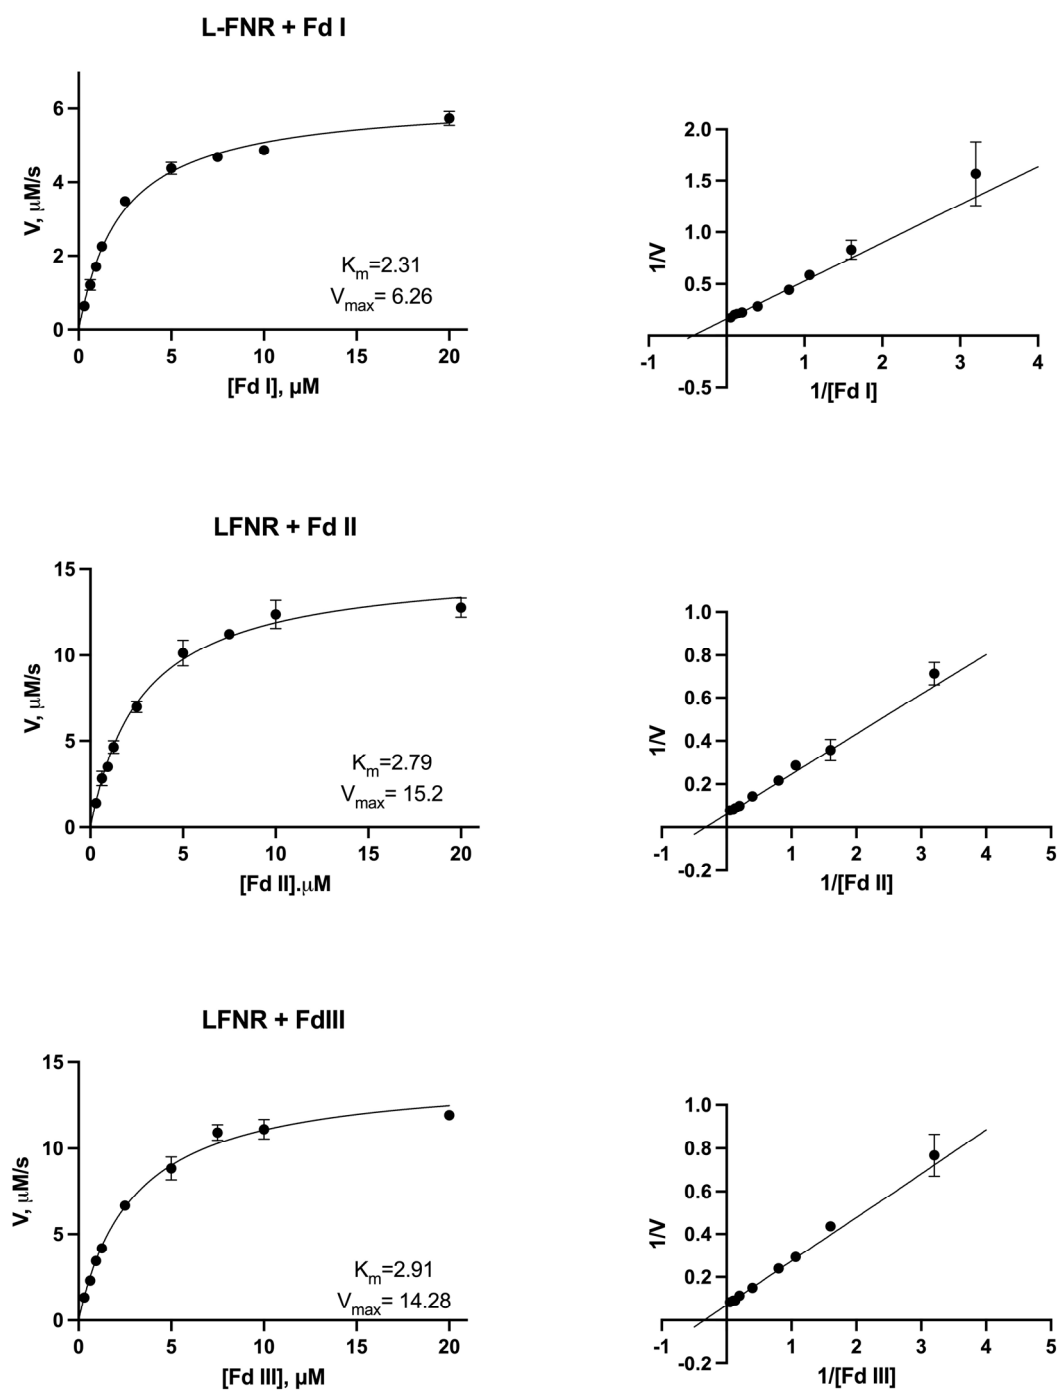

**Figure S10.** Cytochrome c reduction Michaelis-Menten curves (left side) and Lineweaver-Burk plots (right side) for 0.05  $\mu\text{M}$  L-FNR paired with variable concentrations of Fd I, Fd II, and Fd III from peppermint.

|                   |             |            |            |            |             |            |                      |
|-------------------|-------------|------------|------------|------------|-------------|------------|----------------------|
|                   | 10          | 20         | 30         | 40         | 50          | 60         |                      |
| Maize_FdIII       | .... ....   | .... ....  | .... ....  | .... ....  | .... ....   | .... ....  |                      |
| Maize_FdIII       | MSTS----    | TF ATSC    | TLGNV      | RTQASQTAV  | KSPSSL      | SFFS QVTK  | ---VPS LKTSKKLDVS 53 |
| Peppermint_FdII   | MAAA----    | SL PTIC    | MFKSAP     | QRQ-TT     | GAFV KIPSSL | GSVK STSR  | ---IFG LKAKPDFKAT 52 |
| Peppermint_FdIII  | MATA----    | RL PSNC    | VITTAP     | LNKKTASAFT | RGSISL      | GSVK SITK  | ---TFG LKAKLDFRAS 53 |
| Maize_FdI         | MATVLGSPRA  | PA-FFFSSSS | L-----     | RAAPAPTAVA | LPAAKVGIMG  | RSASSRRRLR | 50                   |
| Peppermint_FdI    | MATLSSTM-F  | NR-AFLTRKP | L-----     | AGATSLRSVN | Q-AALFGL--  | KSSSGGGRV  | 46                   |
| Clustal Consensus | *::         | :          |            | :          | .           | :          | :: 7                 |
|                   | 70          | 80         | 90         | 100        | 110         | 120        |                      |
| Maize_FdIII       | .... ....   | .... ....  | .... ....  | .... ....  | .... ....   | .... ....  |                      |
| Maize_FdIII       | AMAVYKVKLV  | GPEGEEHFD  | APDDAYILDA | AETAGVELPY | SCRAGACSTC  | AGKIESGSVD | 113                  |
| Peppermint_FdII   | AMAVYKVKLI  | GPDGDETEFE | APDDCYILDS | AESAGVELPY | SCRAGACSTC  | AGKMEKGTVD | 112                  |
| Peppermint_FdIII  | AMATYKVKLI  | GADGEECEFE | APDDCYILDS | AETAGVELPY | SCRAGACSTC  | AGKMGVGSVD | 113                  |
| Maize_FdI         | AQATYNVKLI  | TPEGE-VELQ | VPDDVYILDQ | AEEDGIDLPI | SCRAGSCSSC  | AGKVVSGSVD | 109 (60)             |
| Peppermint_FdI    | CMASYKVKLL  | TPEGE-VEFD | CPDDMYIVDK | AEEEGVDLPY | SCRAGSCSSC  | AGKVVSGSVD | 105                  |
| Clustal Consensus | . * *::***: | :*:        | *::        | *** **:*   | ** *::***   | *****::**  | ***: .*:** 53        |
|                   | 130         | 140        | 150        | 160        |             |            |                      |
| Maize_FdIII       | .... ....   | .... ....  | .... ....  | .... ....  | .           |            |                      |
| Maize_FdIII       | QSDGSFLDDG  | QEEGYVLTC  | VSYPKSDCVI | HTHKEGDLY  | -           | 152        |                      |
| Peppermint_FdII   | QSDGSFLDDK  | QMEEGYLLTC | VSYPKSDCVI | HTHKEGDLY  | -           | 151        |                      |
| Peppermint_FdIII  | QSDGSFLDDN  | QMEQGYLLTC | VSYPKSDCVI | HTHKEGDLY  | -           | 152        |                      |
| Maize_FdI         | QSDQSYLDDG  | QIADGWVLTC | HAYPTSDVVI | ETHKEEELTG | A           | 150 (101)  |                      |
| Peppermint_FdI    | QSDGSFLDDE  | QVAEGWVLTC | VAYPTSDVVI | ATHKEDDIA  | -           | 144        |                      |
| Clustal Consensus | *** *::***  | * :*:***   | :*::*      | *** :      |             | 82         |                      |

**Figure S11.** Alignment of Fd sequences. Residue numbers in parentheses are counted after removal of the plastidial targeting sequence. Legend for consensus: "\*" means that the residues in that column are identical in all sequences in the alignment; ":" means that conserved substitutions have been observed; "." means that semi-conserved substitutions are observed. Conserved means the amino acid is replaced by one having similar characteristics.
